# Supplementary material
Source: PubMed Central journal article supplement (PMC7042795)
Supplement: jamadermatol-156-312-s001.pdf [file jamadermatol-156-312-s001.pdf]

## Supplementary Online Content

Barbieri JS, Shin DB, Wang S, Margolis DJ, Takeshita J. Association of race/ethnicity and sex with differences in health care use and treatment for acne. *JAMA Dermatol*. Published online February 5, 2020. doi:10.1001/jamadermatol.2019.4818

**eTable.** Prescribing Patterns Between Patients Seen by a Dermatologist at Least Once and Those Never Having Seen a Dermatologist

This supplementary material has been provided by the authors to give readers additional information about their work.

**eTable.** Prescribing Patterns Between Patients Seen by a Dermatologist at Least Once and Those Never Having Seen a Dermatologist

|                           | Topical Retinoid, OR (95% CI), adj |                          | Topical Antibiotic, OR (95% CI), adj |                          | Oral Antibiotic, OR (95% CI), adj |                          |
|---------------------------|------------------------------------|--------------------------|--------------------------------------|--------------------------|-----------------------------------|--------------------------|
|                           | Seen Dermatologist                 | Never Seen Dermatologist | Seen Dermatologist                   | Never Seen Dermatologist | Seen Dermatologist                | Never Seen Dermatologist |
| <b>Race/ethnicity</b>     |                                    |                          |                                      |                          |                                   |                          |
| Non-Hispanic White (67.9) | [Reference]                        | [Reference]              | [Reference]                          | [Reference]              | [Reference]                       | [Reference]              |
| Non-Hispanic Black (8.0)  | 1.39 (1.18-1.63)                   | 1.12 (0.99-1.28)         | 1.52 (1.27-1.82)                     | 1.21 (1.04-1.41)         | 0.90 (0.76-1.05)                  | 0.74 (0.66-0.83)         |
| Non-Hispanic Asian (2.9)  | 0.85 (0.66-1.10)                   | 1.26 (1.03-1.54)         | 1.28 (0.96-1.72)                     | 1.54 (1.24-1.92)         | 0.88 (0.68-1.14)                  | 0.75 (0.62-0.91)         |
| Hispanic (5.5)            | 0.95 (0.76-1.18)                   | 0.95 (0.81-1.10)         | 1.06 (0.81-1.39)                     | 1.05 (0.88-1.25)         | 1.44 (1.17-1.77)                  | 0.82 (0.72-0.93)         |
| Other (15.8)              | 0.84 (0.74-0.95)                   | 0.84 (0.75-0.93)         | 0.95 (0.82-1.10)                     | 0.79 (0.69-0.90)         | 0.85 (0.75-0.96)                  | 0.66 (0.60-0.72)         |
| <b>Age at Diagnosis</b>   |                                    |                          |                                      |                          |                                   |                          |
| <b>Sex</b>                |                                    |                          |                                      |                          |                                   |                          |
| Female                    | [Reference]                        | [Reference]              | [Reference]                          | [Reference]              | [Reference]                       | [Reference]              |
| Male                      | 0.78 (0.71-0.85)                   | 0.97 (0.90-1.04)         | 1.08 (0.97-1.21)                     | 0.86 (0.79-0.94)         | 1.22 (1.12-1.34)                  | 1.09 (1.02-1.15)         |
| <b>Region</b>             |                                    |                          |                                      |                          |                                   |                          |
| Midwest                   | [Reference]                        | [Reference]              | [Reference]                          | [Reference]              | [Reference]                       | [Reference]              |
| Northeast                 | 0.89 (0.78-1.01)                   | 0.91 (0.80-1.03)         | 0.96 (0.83-1.12)                     | 0.80 (0.68-0.93)         | 0.86 (0.76-0.98)                  | 0.64 (0.57-0.71)         |
| South                     | 0.96 (0.85-1.09)                   | 1.04 (0.94-1.14)         | 0.55 (0.46-0.66)                     | 0.65 (0.58-0.73)         | 0.71 (0.63-0.81)                  | 1.00 (0.93-1.08)         |
| West                      | 0.81 (0.68-0.96)                   | 1.23 (1.08-1.40)         | 0.88 (0.72-1.07)                     | 1.14 (0.99-1.33)         | 0.84 (0.71-0.99)                  | 0.97 (0.87-1.09)         |
| <b>Insurance Type</b>     |                                    |                          |                                      |                          |                                   |                          |
| Commercial                | [Reference]                        | [Reference]              | [Reference]                          | [Reference]              | [Reference]                       | [Reference]              |
| Medicaid                  | 1.05 (0.82-1.35)                   | 0.82 (0.72-0.93)         | 1.97 (1.52-2.54)                     | 1.22 (1.05-1.41)         | 0.80 (0.62-1.02)                  | 0.93 (0.83-1.04)         |
| Medicare                  | 1.15 (0.86-1.55)                   | 1.16 (0.83-1.63)         | 1.16 (0.82-1.63)                     | 0.95 (0.65-1.37)         | 0.87 (0.66-1.14)                  | 0.79 (0.62-1.00)         |
| Uninsured                 | 0.40 (0.25-0.62)                   | 0.33 (0.24-0.45)         | 0.60 (0.34-1.06)                     | 0.27 (0.18-0.42)         | 0.74 (0.49-1.12)                  | 0.45 (0.36-0.55)         |
| Mixed: Insured            | 0.90 (0.79-1.01)                   | 1.04 (0.95-1.14)         | 0.98 (0.84-1.13)                     | 1.09 (0.97-1.21)         | 0.82 (0.72-0.92)                  | 1.02 (0.95-1.11)         |
| Mixed: Uninsured          | 0.71 (0.49-1.05)                   | 0.82 (0.62-1.08)         | 1.13 (0.72-1.76)                     | 0.95 (0.68-1.31)         | 0.79 (0.54-1.16)                  | 0.89 (0.71-1.11)         |
| Unknown                   | 0.57 (0.51-0.65)                   | 0.78 (0.70-0.88)         | 0.76 (0.65-0.88)                     | 0.79 (0.69-0.91)         | 0.66 (0.59-0.75)                  | 0.79 (0.71-0.87)         |

|                                          |                                         |                                 |                                              |                                 |                                       |                                 |
|------------------------------------------|-----------------------------------------|---------------------------------|----------------------------------------------|---------------------------------|---------------------------------------|---------------------------------|
| Other                                    | 1.37 (0.99-1.89)                        | 1.90 (1.55-2.32)                | 1.01 (0.67-1.50)                             | 1.06 (0.81-1.39)                | 1.16 (0.85-1.58)                      | 1.16 (0.95-1.41)                |
| <b>Average Household Income (\$1000)</b> | 1.00 (1.00-1.00)                        | 1.00 (1.00-1.01)                | 1.02 (1.01-1.02)                             | 1.01 (1.00-1.01)                | 1.00 (1.00-1.01)                      | 1.00 (0.99-1.00)                |
| <b>Percentage College Education</b>      | 0.99 (0.98-0.99)                        | 1.00 (0.99-1.01)                | 0.98 (0.97-0.99)                             | 1.00 (0.99-1.01)                | 0.98 (0.98-0.99)                      | 0.99 (0.99-1.00)                |
|                                          | <b>Spiro lactone*, OR (95% CI), adj</b> |                                 | <b>Oral Contraceptive*, OR (95% CI), adj</b> |                                 | <b>Isotretinoin, OR (95% CI), adj</b> |                                 |
|                                          | <b>Seen Dermatologist</b>               | <b>Never Seen Dermatologist</b> | <b>Seen Dermatologist</b>                    | <b>Never Seen Dermatologist</b> | <b>Seen Dermatologist</b>             | <b>Never Seen Dermatologist</b> |
| <b>Race/ethnicity</b>                    |                                         |                                 |                                              |                                 |                                       |                                 |
| Non-Hispanic White (67.9)                | [Reference]                             | [Reference]                     | [Reference]                                  | [Reference]                     | [Reference]                           | [Reference]                     |
| Non-Hispanic Black (8.0)                 | 0.60 (0.37-0.96)                        | 0.77 (0.48-1.22)                | 0.84 (0.61-1.17)                             | 0.55 (0.45-0.68)                | 0.35 (0.18-0.70)                      | 0.42 (0.19-0.97)                |
| Non-Hispanic Asian (2.9)                 | 0.85 (0.37-1.97)                        | 0.36 (0.13-0.99)                | 0.90 (0.53-1.51)                             | 0.67 (0.49-0.92)                | 0.95 (0.46-1.96)                      | 0.69 (0.25-1.90)                |
| Hispanic (5.5)                           | 1.11 (0.63-1.96)                        | 0.35 (0.15-0.80)                | 0.89 (0.56-1.42)                             | 0.55 (0.43-0.71)                | 0.80 (0.43-1.50)                      | 0.54 (0.24-1.23)                |
| Other (15.8)                             | 0.67 (0.44-1.01)                        | 1.13 (0.80-1.57)                | 0.78 (0.59-1.01)                             | 0.62 (0.53-0.73)                | 0.82 (0.57-1.17)                      | 0.48 (0.27-0.85)                |
| <b>Age at Diagnosis</b>                  |                                         |                                 |                                              |                                 |                                       |                                 |
| <b>Sex</b>                               |                                         |                                 |                                              |                                 |                                       |                                 |
| Female                                   |                                         |                                 |                                              |                                 | [Reference]                           | [Reference]                     |
| Male                                     |                                         |                                 |                                              |                                 | 2.85 (2.23-3.66)                      | 1.94 (1.43-2.64)                |
| <b>Region</b>                            |                                         |                                 |                                              |                                 |                                       |                                 |
| Midwest                                  | [Reference]                             | [Reference]                     | [Reference]                                  | [Reference]                     | [Reference]                           | [Reference]                     |
| Northeast                                | 0.60 (0.39-0.93)                        | 0.59 (0.34-1.01)                | 0.74 (0.57-0.96)                             | 0.76 (0.63-0.92)                | 0.91 (0.62-1.33)                      | 0.62 (0.33-1.15)                |
| South                                    | 1.33 (1.00-1.77)                        | 1.02 (0.77-1.36)                | 0.43 (0.32-0.59)                             | 0.93 (0.81-1.06)                | 1.22 (0.89-1.69)                      | 0.95 (0.63-1.41)                |
| West                                     | 0.74 (0.45-1.23)                        | 1.57 (1.09-2.26)                | 0.76 (0.54-1.08)                             | 1.03 (0.86-1.24)                | 0.77 (0.46-1.28)                      | 1.01 (0.55-1.86)                |
| <b>Insurance Type</b>                    |                                         |                                 |                                              |                                 |                                       |                                 |
| Commercial                               | [Reference]                             | [Reference]                     | [Reference]                                  | [Reference]                     | [Reference]                           | [Reference]                     |
| Medicaid                                 | 0.48 (0.19-1.20)                        | 0.60 (0.34-1.04)                | 0.71 (0.43-1.17)                             | 0.66 (0.54-0.81)                | 1.09 (0.59-2.02)                      | 0.11 (0.03-0.43)                |
| Medicare                                 | 0.30 (0.14-0.65)                        | 0.35 (0.17-0.71)                | 0.11 (0.02-0.81)                             | 0.66 (0.38-1.16)                | 0.49 (0.12-2.11)                      | 0.47 (0.06-3.50)                |
| Uninsured                                | 0.18 (0.02-1.30)                        | 0.07 (0.01-0.54)                | 0.73 (0.35-1.55)                             | 0.35 (0.23-0.53)                | 0.47 (0.11-1.94)                      | 0.32 (0.08-1.31)                |
| Mixed: Insured                           | 0.58 (0.41-0.82)                        | 0.69 (0.50-0.94)                | 0.73 (0.57-0.95)                             | 0.98 (0.86-1.12)                | 0.55 (0.38-0.81)                      | 1.00 (0.70-1.43)                |
| Mixed: Uninsured                         | 0.36 (0.09-1.50)                        | 0.81 (0.33-2.00)                | 0.50 (0.20-1.27)                             | 0.84 (0.56-1.26)                | 0.35 (0.09-1.46)                      | 0.26 (0.04-1.87)                |
| Unknown                                  | 0.37 (0.24-0.57)                        | 0.63 (0.43-0.94)                | 0.68 (0.52-0.87)                             | 0.83 (0.70-0.98)                | 0.47 (0.32-0.69)                      | 0.48 (0.26-0.86)                |
| Other                                    | 0.24 (0.06-0.97)                        | 1.28 (0.69-2.40)                | 1.20 (0.65-2.21)                             | 1.35 (1.01-1.81)                | 0.71 (0.31-1.64)                      | 0.37 (0.09-1.50)                |

|                                          |                  |                  |                  |                  |                  |                  |
|------------------------------------------|------------------|------------------|------------------|------------------|------------------|------------------|
| <b>Average Household Income (\$1000)</b> | 0.96 (0.94-0.97) | 0.98 (0.97-1.00) | 0.99 (0.99-1.00) | 1.00 (0.99-1.01) | 0.98 (0.97-0.99) | 1.00 (0.98-1.02) |
| <b>Percentage College Education</b>      | 1.02 (1.00-1.04) | 1.01 (0.99-1.02) | 1.00 (0.99-1.02) | 1.01 (1.00-1.01) | 1.00 (0.98-1.02) | 1.01 (0.98-1.03) |

\*Among women only
